# Supplementary material
Source: PubMed Central journal article supplement (PMC3490447)
Supplement: NIHMS383713-supplement-Supp_Fig_S1-S4.pdf [file NIHMS383713-supplement-Supp_Fig_S1-S4.pdf]

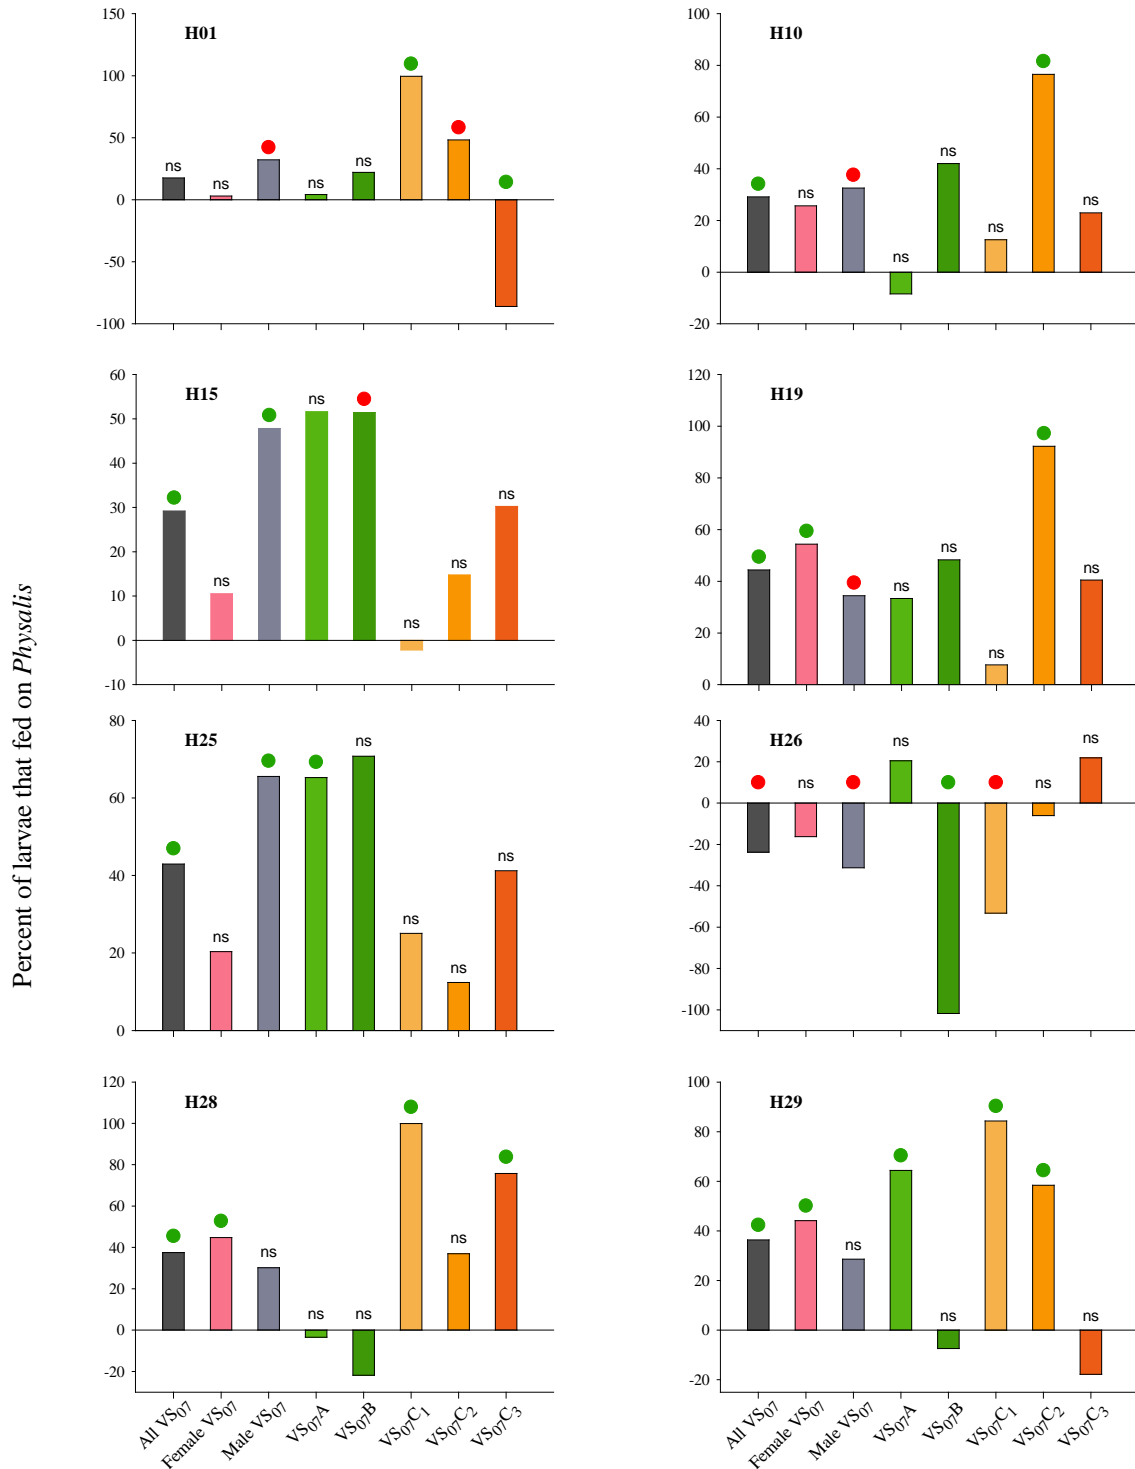

**Supplemental Figure 1.** The effect *H. subflexa*-origin chromosomes on the willingness of VS07 backcross larvae to feed on *Physalis* (expressed as the percent of larvae that fed). Bars are the additive effect of chromosome presence on larval phenotype (i.e. the mean phenotypic difference between chromosome-present and chromosome-absent larvae). Data are shown for the population as a whole, for each sex, for each lineage, and for families within the VS07C lineage. Significance levels are indicated by the symbol above each bar: Green dot = Significant ( $p < 0.05$ ); Red dot = Suggestive ( $0.05 < p < 0.1$ ); ns = not significant. No chromosomes were significant for larval feeding in VS01 population.

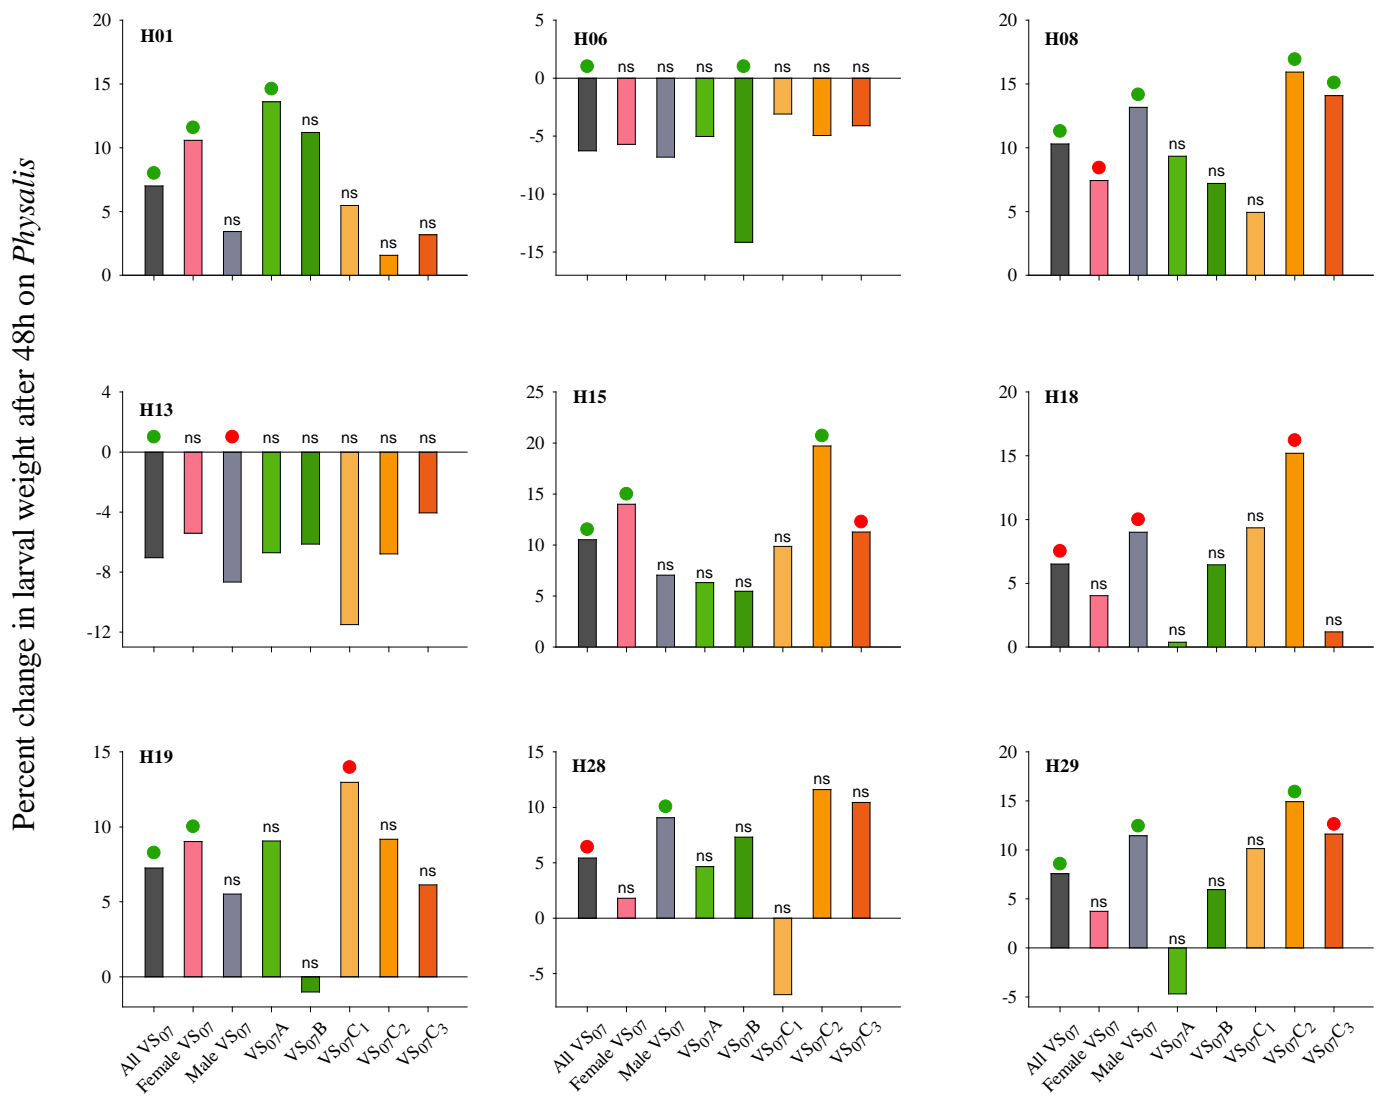

**Supplemental Figure 2a.** The effect of *H. subflexa*-origin chromosomes on the percent change in larval weight for backcross larvae from VS<sub>07</sub>.

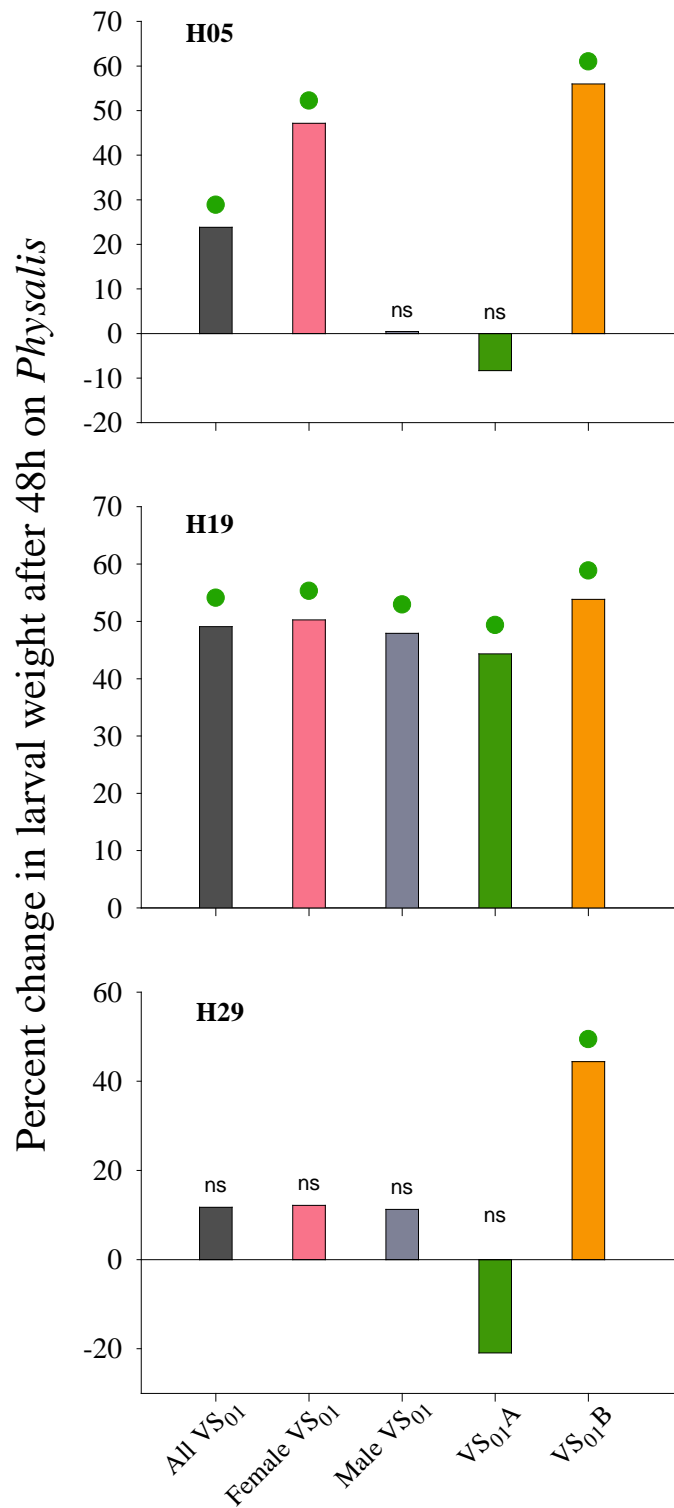

**Supplemental Figure 2b.** The effect of *H. subflexa*-origin chromosomes on the percent change in larval weight for backcross larvae from VS01. Data are shown for the population as a whole, for each sex, and for each lineage.

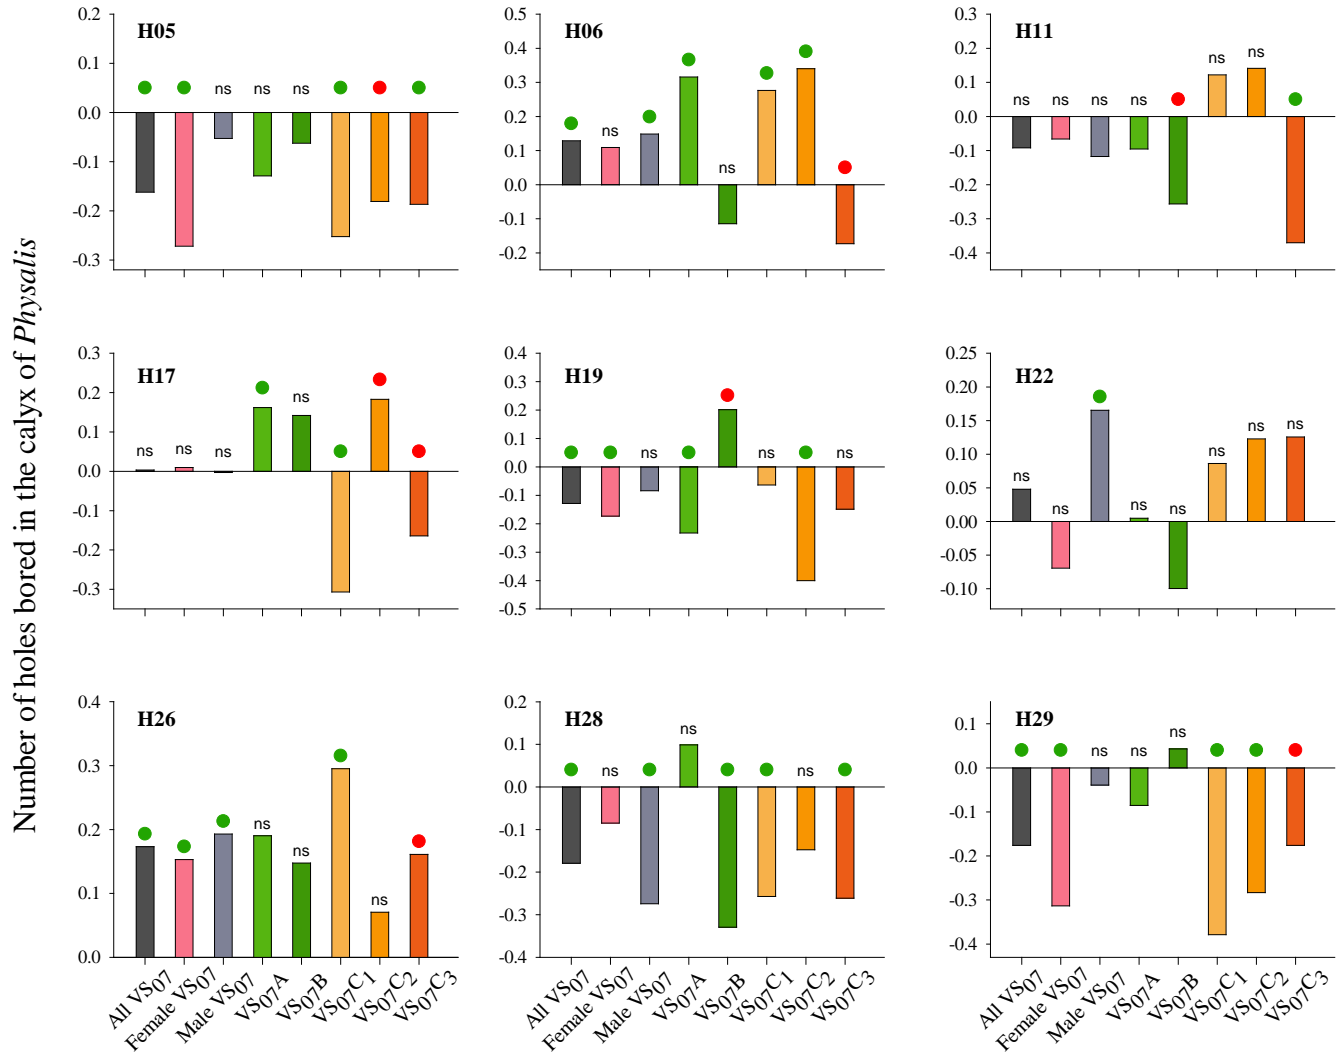

**Supplemental Figure 3a.** The effect of *H. subflexa*-origin chromosomes on the number of holes bored in the calyx of *Physalis* by backcross larvae from VS07.

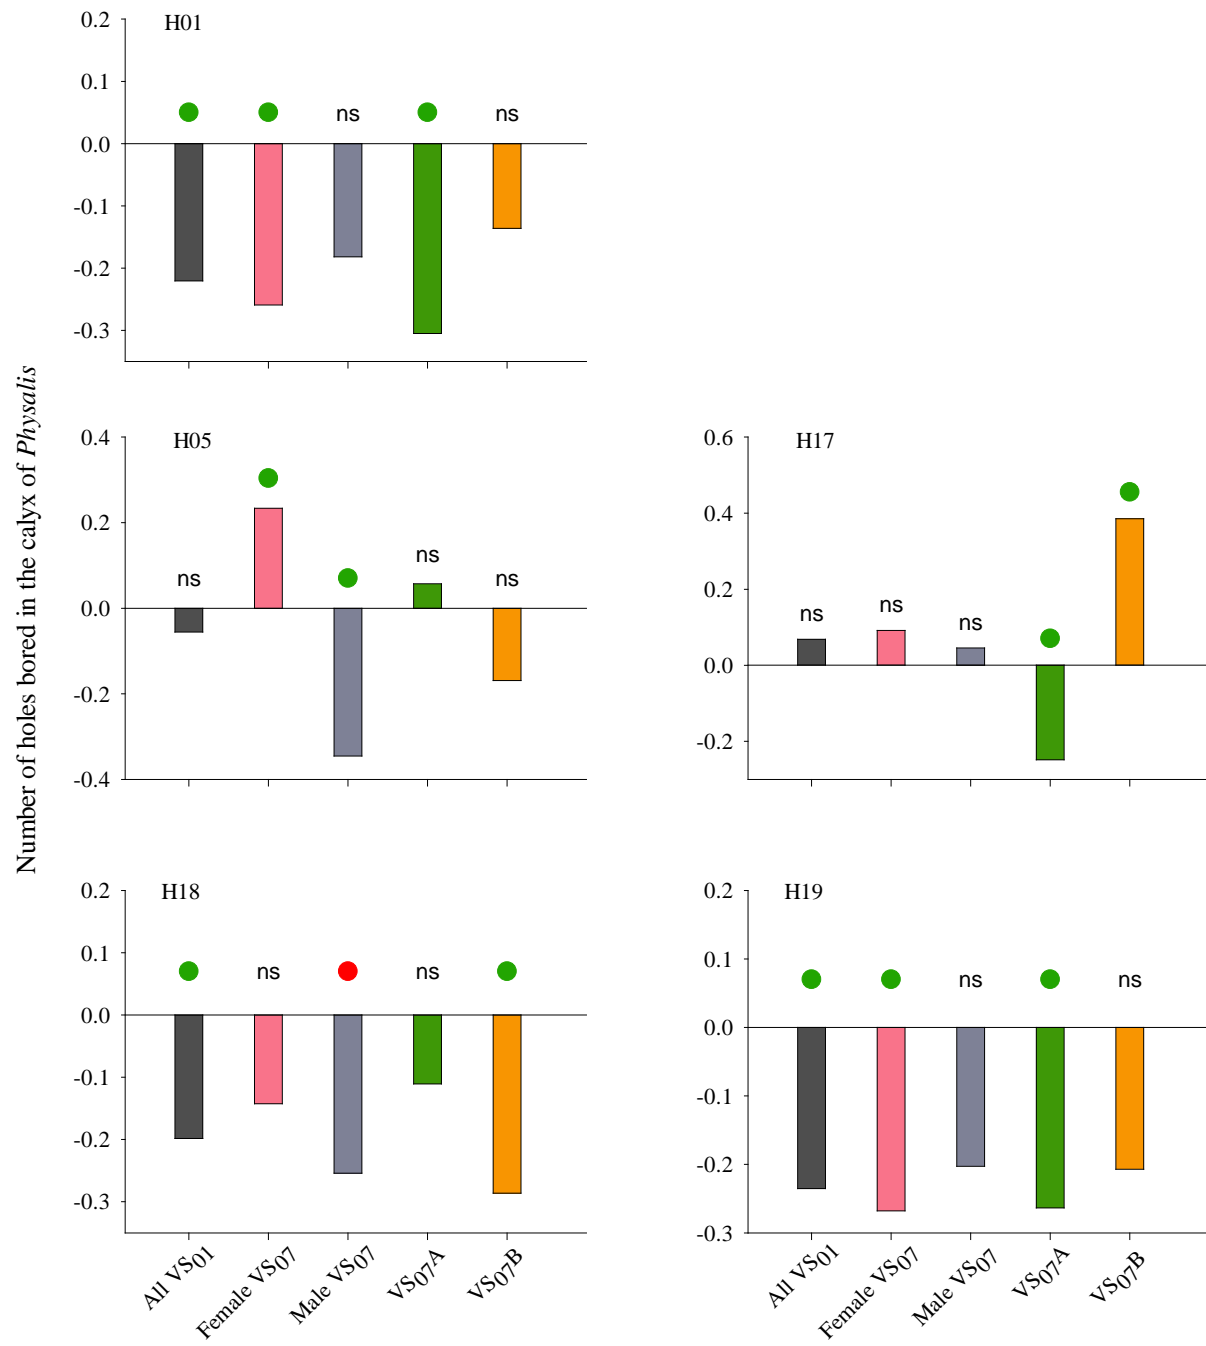

**Supplemental Figure 3b.** The effect of *H. subflexa*-origin chromosomes on the number of holes bored in the calyx of *Physalis* by backcross larvae from VS01.

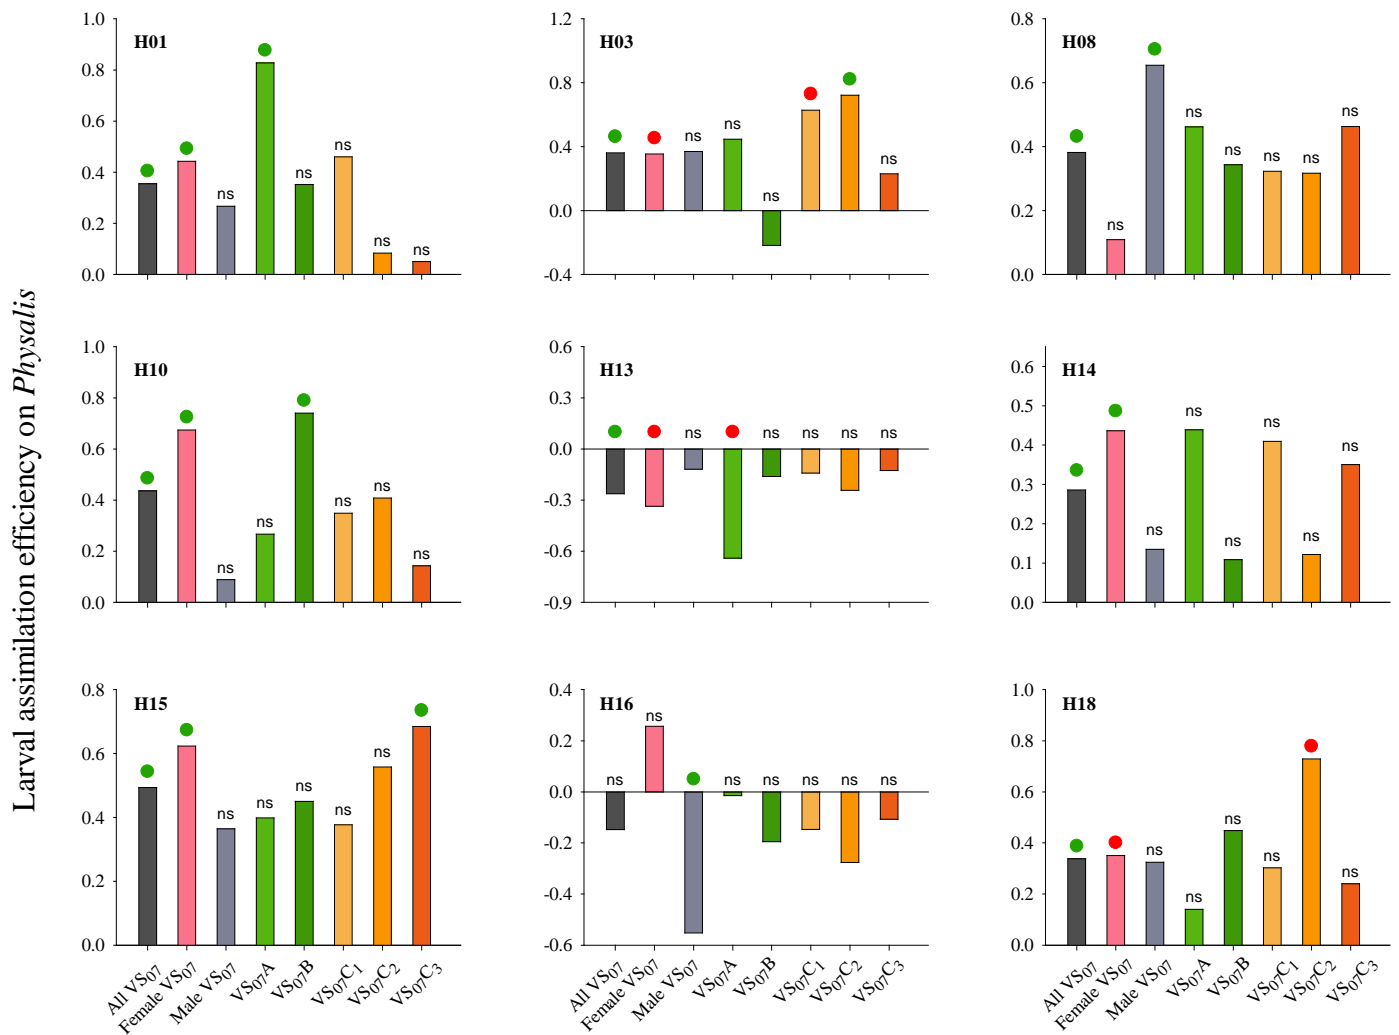

**Supplemental Figure 4a.** The effect of *H. subflexa*-origin chromosomes on the assimilation efficiency of backcross larvae from VS07.

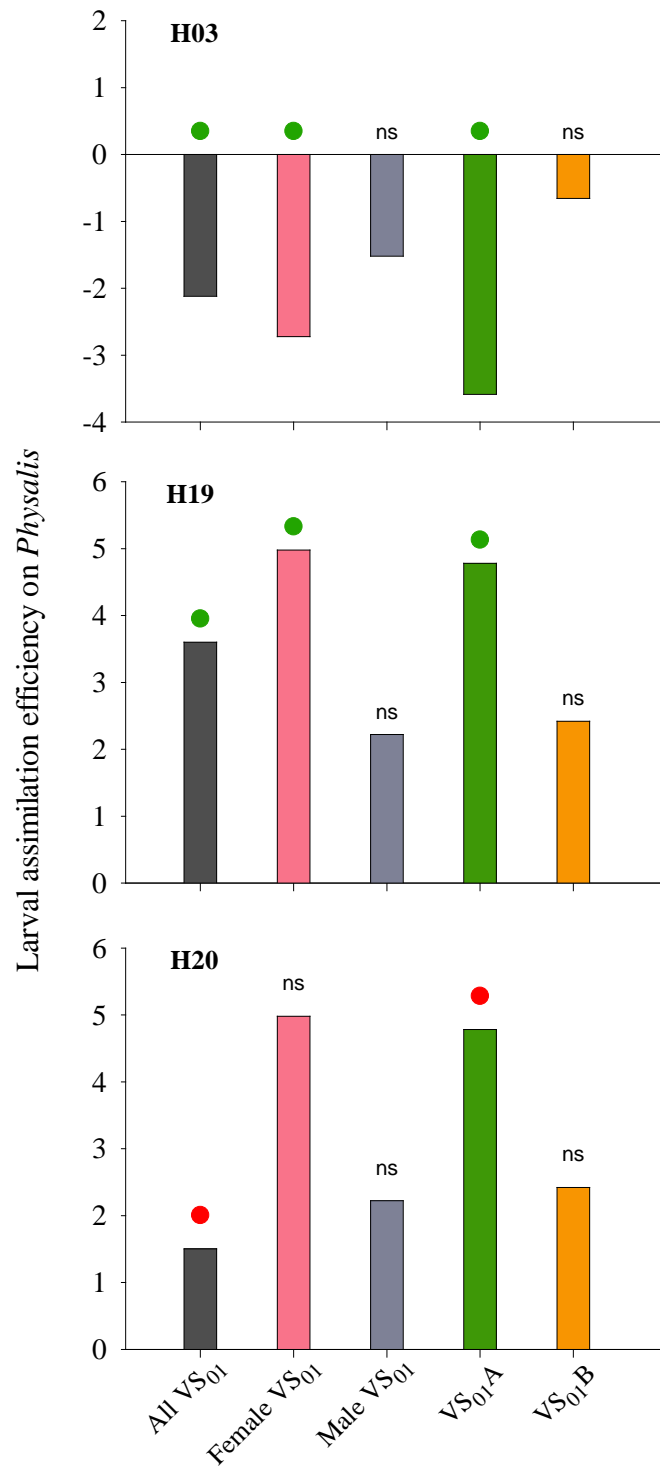

**Supplemental Figure 4b.** The effect of *H. subflexa*-origin chromosomes on the assimilation efficiency of backcross larvae from VS01.
