# Supplementary material
Source: PubMed Central journal article supplement (PMC3490447)
Supplement: NIHMS383713-supplement-Supp_Table_S6-S9.pdf [file NIHMS383713-supplement-Supp_Table_S6-S9.pdf]

Supplementary Table 1. Gene-based markers.

| Marker Name                   | Gene Description                                                                                                     | GenBank Accession Number | VS <sub>07</sub> Chromosome | VS <sub>01</sub> Chromosome | Forward Primer (5'-3')      | Reverse Primer (5'-3')                                           |
|-------------------------------|----------------------------------------------------------------------------------------------------------------------|--------------------------|-----------------------------|-----------------------------|-----------------------------|------------------------------------------------------------------|
| <i>Cp5<sub>A</sub></i>        | <i>H. virescens</i> partial mRNA for putative chemosensory receptor 5                                                | AJ487480                 | not done                    | H01                         | GTTTCATCAGCTTAATATGGAGCACTT | GAACGTATCGCTTCAGTATCAAAGAT                                       |
| <i>Vgcc</i>                   | <i>Lepidoptera</i> voltage-gated calcium channel                                                                     | DD345735                 | not done                    | H01                         | AACTGGATTTACTTTGTGCCTCTC    | ACTTCCTCTGCTTTACAAATCCAC                                         |
| <i>Cp4</i>                    | <i>H. virescens</i> mRNA for putative chemosensory receptor 4                                                        | AJ487479                 | not done                    | H04                         | TTATACTATAGCAGAGGGCAAAGAA   | CATAAATGACTAGAGCCGTTCAAT                                         |
| <i>Cr2<sub>A</sub></i>        | <i>H. virescens</i> mRNA for putative chemosensory receptor 2                                                        | AJ487477                 | not done                    | H04                         | AATTAGGGCAACTTGTTTGAT       | TTATTTTGCACCAGATTAAGAAATG                                        |
| <i>Ddc</i>                    | <i>H. virescens</i> DOPA decarboxylase (DDC) gene, partial                                                           | U71428                   | not done                    | H05                         | CTATGATACGCGTGAAGAAACAAC    | TGAGGTAACGATATTCAGGACAGA                                         |
| <i>Cp19</i>                   | <i>H. virescens</i> mRNA for putative chemosensory receptor 19                                                       | AJ748334                 | not done                    | H06                         | TTCAAGGTGTTGGAAGTGAAGTAC    | GAAGAAGTCCCTACAAACAACACA                                         |
| <i>Cp14<sub>A</sub></i>       | <i>H. virescens</i> mRNA for putative chemosensory receptor 14                                                       | AJ748329                 | not done                    | H07                         | GTTACACTGTACCTCACTGG        | GAACAACATTGGCCCGAATAC                                            |
| <i>Csp1</i>                   | <i>H. virescens</i> chemosensory protein 1 (CSP1) gene                                                               | AY766374                 | not done                    | H08                         | CAAGTATGACAACGTAGACCTGGA    | GTTCTCGAGAGCTTCAATGATGT                                          |
| <i>Cry1Ac</i>                 | <i>H. virescens</i> cadherin-like Cry1Ac receptor                                                                    | AY692445                 | not done                    | H10                         | TTGGTTTAAAGTCGCTCCAATAGACA  | AAGTCCAGCATGTGATGGTTCTGCGT                                       |
| <i>Vatp</i>                   | <i>Vacuolar (V-type) H(+)-ATPase B subunit gene</i>                                                                  | S61797                   | not done                    | H17                         | AACTTCGCCATCGTGTTCGCCGCTAT  | GTGTACATGTAACCTGGGAAACCACG                                       |
| <i>Hscp</i>                   | <i>H. virescens</i> voltage-gated sodium channel alpha subunit (hscp) gene                                           | AF072463                 | not done                    | H23                         | CTTATTCAACATCTGTCTGCTGCT    | GATGTACATGTTGATGACGATGAG                                         |
| <i>Ryr</i>                    | <i>H. virescens</i> ryanodine receptor (ryr)                                                                         | AF009346                 | not done                    | H27                         | CTTCGTGTTCAACCTGTACAAGG     | ACTGGTCACGCAGCTCTCCGA                                            |
| <i>Abp2</i>                   | <i>H. virescens</i> mRNA for antennal binding protein (abp2) gene                                                    | AJ300654                 | not done                    | H28                         | CATTGATCCTTGTTTTATGAGCTG    | TTTGCAGTTGATCTTCAATCATT                                          |
| <i>RpL31</i>                  | <i>H. virescens</i> mRNA for ribosomal protein L31 (r131) gene                                                       | AJ298149                 | not done                    | H29                         | CAACGAAGTTGTAAGTCTCGTG      | TTCTTGGCTAGCGTCCACAT                                             |
| <i>Cp11</i>                   | <i>H. virescens</i> mRNA for putative chemosensory receptor 11                                                       | AJ748326                 | H03                         | H03                         | CAGGCATTACGGGTCCAATGG       | GGTCAAACATCGACACGCTGC                                            |
| <i>Cp14<sub>B</sub></i>       | <i>H. virescens</i> mRNA for putative chemosensory receptor 14                                                       | AJ748329                 | H07                         | not done                    | GTTACACTGTACCTCACTGG        | GTGGTCAGGTTTGCTGGCCTTGG                                          |
| <i>Cp5<sub>B</sub></i>        | <i>H. virescens</i> partial mRNA for putative chemosensory receptor 5                                                | AJ487480                 | H01                         | not done                    | CTGTCCTGCTCATGCAACTTC       | TGCATCATTGCCTTGATCATC                                            |
| <i>Cr12</i>                   | <i>H. virescens</i> mRNA for putative chemosensory receptor 12                                                       | AJ748327                 | H18                         | not done                    | TGGCCTTGGGTGTATCTGCGACAG    | CTCGATACAGTGTGAGCAATCG                                           |
| <i>Cr18</i>                   | <i>H. virescens</i> mRNA for putative chemosensory receptor 18                                                       | AJ748333                 | H14                         | not done                    | TTACCATATCATCAAGGAGCGTG     | AGGGCCATAAACGTTCTGCAGCT                                          |
| <i>Cr2<sub>B</sub></i>        | <i>H. virescens</i> mRNA for putative chemosensory receptor 2                                                        | AJ487477                 | H04                         | not done                    | GAAGCGGCTTACTCCTGCCAGTGG    | CATGAAGTAGGTTACCACGGCTCC                                         |
| <i>Csp2</i>                   | <i>H. virescens</i> chemosensory protein 2 (CSP2) gene                                                               | AY766375                 | H08                         | not done                    | GAAATCTTGAGTCTCAGCGCCT      | AAAGCTTTGGTAACTGCGTCTG                                           |
| <i>Dd23</i>                   | <i>Developed by the Gould lab (NCSU) from an AFLP marker; located on a chromosome involved in acetate production</i> | .                        | H06                         | not done                    | TCCAGGCTTTTCTAATACAACG      | CCAAACTGACCTTAGGATCTTC                                           |
| <i>Ef1<math>\alpha</math></i> | <i>H. virescens</i> elongation factor 1-alpha (EF-1 $\alpha$ )gene, partial                                          | U20135                   | H13                         | not done                    | GAATTCACAAAACAAGGAGTGTG     | Rev. #1: CAGGTTACAAAATCAGCTGCTA; Rev. #2: CAGGTAACAAAATCAGCTGCTA |
| <i>Snmp</i>                   | <i>H. virescens</i> mRNA for sensory neuron membrane protein-1 (snmp1) gene                                          | AJ251959                 | H12                         | not done                    | GGACTGAATCCTGATGTCACCCAA    | GACAAGTCCTTGAATAGGTCCAGC                                         |
| <i><math>\delta 9</math></i>  | <i>Developed by Mike Ward (NCSU), based on Helicoverpa zea acyl-CoA delta-9 desaturase mRNA (FBDS) gene</i>          | AF272345                 | H28                         | not done                    | CAAGTACTCTGAAACGGATGCTG     | TGATGTTCTTGTGGAAGGCTTGG                                          |
| <i>Jhbp</i>                   | <i>H. virescens</i> juvenile hormone binding protein mRNA (JHBP) gene                                                | U22515                   | not done                    | unlinked                    | GACTTCAAAATGGATACAGACAAGAA  | GCAAGGCCTTTTGTAACTCTTCTC                                         |

**Supplementary Table 2.** AFLP primer pairs used for linkage mapping and the number of informative markers generated by each pair across years and families.

| Primers       |              | Informative Loci                  |                                 |                    |                    |                                 |                                 |                    |                    |
|---------------|--------------|-----------------------------------|---------------------------------|--------------------|--------------------|---------------------------------|---------------------------------|--------------------|--------------------|
| <i>Eco</i> RI | <i>Mse</i> I | Total Markers<br>from Primer Pair | VS <sub>07</sub> C <sub>1</sub> | VS <sub>07</sub> A | VS <sub>07</sub> B | VS <sub>07</sub> C <sub>2</sub> | VS <sub>07</sub> C <sub>3</sub> | VS <sub>01</sub> A | VS <sub>01</sub> B |
| AAA           | CGA          | 29                                | 23                              | 22                 | 13                 | 13                              | 18                              | 14                 | 15                 |
|               | CTG          | 46                                | 41                              | 38                 | 18                 | 15                              | 17                              | 12                 | 10                 |
| AAC           | CCC          | 17                                | 9                               | 9                  | 5                  | 6                               | 7                               | 7                  | 6                  |
|               | CCT          | 31                                | 21                              | 18                 | 18                 | 15                              | 13                              | 17                 | 18                 |
| AAg           | CAG          | 26                                | 14                              | 13                 | 11                 | 10                              | 12                              | 10                 | 8                  |
|               | CGA          | 15                                | 11                              | 8                  | 6                  | 7                               | 9                               | 8                  | 7                  |
| AAT           | CAG          | 32                                | 23                              | 23                 | 14                 | 15                              | 11                              | 9                  | 20                 |
| ACC           | CAG          | 10                                | 7                               | 5                  | 5                  | 7                               | 7                               | 6                  | 8                  |
|               | CTT          | 17                                | 16                              | 16                 | 11                 | 12                              | 11                              | 12                 | 13                 |
| ACg           | CAG          | 11                                | 8                               | 8                  | 5                  | 8                               | 5                               | 5                  | 5                  |
|               | CTT          | 17                                | 10                              | 7                  | 9                  | 4                               | 8                               | 8                  | 6                  |
| ACT           | CCT          | 29                                | 16                              | 15                 | 15                 | 12                              | 13                              | 5                  | 15                 |
| AgA           | CGG          | 12                                | 9                               | 9                  | 10                 | 10                              | 10                              | 8                  | 11                 |
| AgC           | CCA          | 24                                | 14                              | 14                 | 17                 | 11                              | 13                              | 8                  | 12                 |
| ATA           | CTA          | 32                                | 18                              | 18                 | 18                 | 19                              | 17                              | 17                 | 20                 |
| ATC           | CAA          | 29                                | 22                              | 21                 | 19                 | 19                              | 15                              | 11                 | 14                 |
|               | CAG          | 20                                | 11                              | 9                  | 10                 | 10                              | 10                              | 9                  | 11                 |
|               | CAT          | 33                                | 23                              | 22                 | 19                 | 18                              | 22                              | 15                 | 11                 |
|               | CCT          | 23                                | 17                              | 16                 | 18                 | 16                              | 18                              | 6                  | 19                 |
| Total Markers |              | 453                               | 313                             | 291                | 241                | 227                             | 236                             | 187                | 229                |

**Supplementary Table 3.** Chromosomes identified in all seven VS backcross families. Linkage groups that shared at least two markers across families were considered homologous.

| Chromosome | # AFLP Loci | # AFLP Primer Pairs | Gene-Based Markers                 | # Loci Present in Each Family |                   |                               |                               |                               |                   |                   | Percent of Individuals with Chromosome Present |
|------------|-------------|---------------------|------------------------------------|-------------------------------|-------------------|-------------------------------|-------------------------------|-------------------------------|-------------------|-------------------|------------------------------------------------|
|            |             |                     |                                    | VS <sub>07A</sub>             | VS <sub>07B</sub> | VS <sub>07C<sub>1</sub></sub> | VS <sub>07C<sub>2</sub></sub> | VS <sub>07C<sub>3</sub></sub> | VS <sub>01A</sub> | VS <sub>01B</sub> |                                                |
| H01        | 13          | 9                   | <i>Cp5<sub>A&amp;B</sub>, Vgcc</i> | 12                            | 10                | 12                            | 11                            | 11                            | 7                 | 8                 | 48                                             |
| H02        | 25          | 14                  |                                    | 20                            | 14                | 19                            | 11                            | 15                            | 16                | 11                | 44                                             |
| H03        | 18          | 10                  | <i>Cp11</i>                        | 14                            | 13                | 11                            | 12                            | 12                            | 10                | 12                | 52                                             |
| H04        | 12          | 6                   | <i>Cr2<sub>A&amp;B</sub>, Cp4</i>  | 9                             | 9                 | 10                            | 8                             | 9                             | 5                 | 10                | 50                                             |
| H05        | 15          | 10                  | <i>Ddc</i>                         | 10                            | 6                 | 8                             | 7                             | 8                             | 6                 | 8                 | 48                                             |
| H06        | 22          | 9                   | <i>Dd23, Cp19</i>                  | 11                            | 9                 | 13                            | 10                            | 8                             | 13                | 8                 | 48                                             |
| H07        | 16          | 10                  | <i>Cp14<sub>A&amp;B</sub></i>      | 10                            | 10                | 9                             | 11                            | 7                             | 7                 | 8                 | 50                                             |
| H08        | 15          | 7                   | <i>Csp2, Csp1</i>                  | 5                             | 2                 | 7                             | 3                             | 9                             | 8                 | 4                 | 50                                             |
| H09        | 16          | 9                   |                                    | 9                             | 11                | 8                             | 7                             | 6                             | 5                 | 9                 | 50                                             |
| H10        | 28          | 15                  | <i>Cry1Ac</i>                      | 15                            | 8                 | 14                            | 9                             | 9                             | 9                 | 12                | 50                                             |
| H11        | 12          | 8                   |                                    | 9                             | 10                | 8                             | 11                            | 11                            | 4                 | 6                 | 50                                             |
| H12        | 9           | 5                   | <i>Snmp</i>                        | 7                             | 5                 | 8                             | 4                             | 4                             | 5                 | 4                 | 47                                             |
| H13        | 17          | 12                  | <i>Jhbp, Efla</i>                  | 8                             | 5                 | 6                             | 4                             | 6                             | 7                 | 7                 | 49                                             |
| H14        | 13          | 11                  | <i>Cr18</i>                        | 5                             | 6                 | 7                             | 4                             | 4                             | 4                 | 7                 | 47                                             |
| H15        | 13          | 9                   |                                    | 8                             | 9                 | 7                             | 8                             | 8                             | 4                 | 5                 | 50                                             |
| H16        | 12          | 9                   |                                    | 8                             | 8                 | 8                             | 8                             | 8                             | 5                 | 7                 | 48                                             |
| H17        | 11          | 7                   | <i>Vatp</i>                        | 7                             | 8                 | 6                             | 4                             | 3                             | 5                 | 6                 | 50                                             |
| H18        | 14          | 9                   | <i>Cr12</i>                        | 9                             | 7                 | 7                             | 7                             | 8                             | 6                 | 5                 | 49                                             |
| H19        | 17          | 13                  |                                    | 8                             | 12                | 8                             | 6                             | 6                             | 5                 | 9                 | 50                                             |
| H20        | 9           | 6                   |                                    | 6                             | 6                 | 5                             | 7                             | 6                             | 3                 | 6                 | 45                                             |
| H21        | 9           | 6                   |                                    | 4                             | 4                 | 4                             | 5                             | 6                             | 6                 | 7                 | 49                                             |
| H22        | 7           | 7                   |                                    | 3                             | 5                 | 3                             | 3                             | 5                             | 3                 | 3                 | 49                                             |
| H23        | 17          | 8                   | <i>Hscp</i>                        | 9                             | 11                | 8                             | 11                            | 11                            | 9                 | 12                | 50                                             |
| H24        | 10          | 8                   |                                    | 7                             | 5                 | 4                             | 5                             | 7                             | 3                 | 2                 | 45                                             |
| H25        | 15          | 11                  |                                    | 4                             | 5                 | 6                             | 4                             | 7                             | 5                 | 10                | 49                                             |
| H26        | 14          | 10                  |                                    | 6                             | 6                 | 7                             | 7                             | 6                             | 9                 | 7                 | 50                                             |
| H27        | 12          | 8                   | <i>Ryr</i>                         | 6                             | 6                 | 8                             | 6                             | 4                             | 6                 | 7                 | 48                                             |
| H28        | 17          | 10                  | <i>δ9, Abp2</i>                    | 10                            | 9                 | 12                            | 8                             | 7                             | 7                 | 10                | 48                                             |
| H29        | 10          | 7                   | <i>RpL31</i>                       | 8                             | 7                 | 6                             | 4                             | 6                             | 2                 | 2                 | 48                                             |

**Supplementary Table 4.** Phenotypic means for the seven backcross families used in this study. Values shown are  $\bar{x} \pm 95\%$  CI.

| Trait                           | Units                                                           | VS <sub>01</sub> A | VS <sub>01</sub> B | VS <sub>07</sub> A | VS <sub>07</sub> B | VS <sub>07</sub> C <sub>1</sub> | VS <sub>07</sub> C <sub>2</sub> | VS <sub>07</sub> C <sub>3</sub> |
|---------------------------------|-----------------------------------------------------------------|--------------------|--------------------|--------------------|--------------------|---------------------------------|---------------------------------|---------------------------------|
| Larval Start Weight             | mg                                                              | 1.54 ± 0.08        | 1.85 ± 0.06        | 1.28 ± 0.07        | 1.22 ± 0.06        | 1.02 ± 0.05                     | 1.33 ± 0.07                     | 1.25 ± 0.09                     |
| Larval Feeding                  | percent                                                         | 83.33 ± 5.46       | 83.2 ± 6.58        | 76.1 ± 5.29        | 72.51 ± 6.04       | 65.3 ± 6.32                     | 65.43 ± 5.99                    | 69.76 ± 5.73                    |
| Change in Fruit Weight          | g                                                               | 1.6 ± 0.16         | 2.06 ± 0.12        | 3 ± 0.07           | 3.14 ± 0.07        | 2.99 ± 0.08                     | 3.06 ± 0.08                     | 2.89 ± 0.07                     |
| Percent Change in Larval Weight | percent                                                         | 8.2 ± 8.63         | 83.35 ± 22.69      | 66.31 ± 6.29       | 59.03 ± 6.3        | 59.01 ± 6.59                    | 59.86 ± 7.5                     | 54.35 ± 6.11                    |
| Number of Holes in Calyx        | number of holes                                                 | 1.77 ± 0.22        | 2.4 ± 0.33         | 2.24 ± 0.29        | 1.49 ± 0.2         | 2.48 ± 0.38                     | 1.67 ± 0.23                     | 2.12 ± 0.3                      |
| Assimilation Efficiency         | mg change in larval weight per g <i>Physalis</i> fruit consumed | 1.96 ± 2.5         | 5.68 ± 1.84        | 2.83 ± 0.37        | 2.58 ± 0.33        | 2.03 ± 0.25                     | 2.68 ± 0.36                     | 2.29 ± 0.3                      |

**Supplementary Table 5.** Chromosomes affecting willingness to feed on *Physalis* in VS<sub>07</sub> backcross insects.

| Factor                                                                               |                                 | H01                               | H10                              | H15                              | H19                                | H25                              | H26                             | H28                              | H29                              |
|--------------------------------------------------------------------------------------|---------------------------------|-----------------------------------|----------------------------------|----------------------------------|------------------------------------|----------------------------------|---------------------------------|----------------------------------|----------------------------------|
| <b>1) Genome-wide significance<sup>a</sup></b>                                       |                                 |                                   |                                  |                                  |                                    |                                  |                                 |                                  |                                  |
|                                                                                      | Observed <i>F</i>               | ns                                | ns                               | ns                               | 13.957                             | ns                               | ns                              | 8.77                             | ns                               |
|                                                                                      | Chromosome                      | ns                                | $F_{1,1136}=5.41$ ;<br>$p=0.02$  | $F_{1,1135}=5.02$ ;<br>$p=0.03$  | $F_{1,1136}=12.66$ ;<br>$p=0.0004$ | $F_{1,1136}=7.92$ ;<br>$p=0.005$ | $F_{1,1132}=3.61$ ;<br>$p=0.06$ | $F_{1,1132}=7.71$ ;<br>$p=0.006$ | $F_{1,1132}=7.21$ ;<br>$p=0.007$ |
|                                                                                      | Sex                             | $F_{1,1132}=5.5$ ;<br>$p=0.02$    | $F_{1,1136}=5.91$ ;<br>$p=0.02$  | $F_{1,1135}=5.32$ ;<br>$p=0.02$  | $F_{1,1136}=5.79$ ;<br>$p=0.02$    | $F_{1,1136}=5.32$ ;<br>$p=0.02$  | $F_{1,1132}=4.82$ ;<br>$p=0.03$ | $F_{1,1132}=7.07$ ;<br>$p=0.008$ | $F_{1,1132}=6.35$ ;<br>$p=0.01$  |
|                                                                                      | Family                          | ns                                | $F_{4,1136}=2.33$ ;<br>$p=0.05$  | $F_{4,1135}=2.6$ ;<br>$p=0.03$   | $F_{4,1136}=2.43$ ;<br>$p=0.05$    | $F_{4,1136}=2.58$ ;<br>$p=0.04$  | $F_{4,1132}=2.86$ ;<br>$p=0.02$ | ns                               | ns                               |
| <b>2) Mixed model analysis of chromosome by environment interactions<sup>b</sup></b> |                                 |                                   |                                  |                                  |                                    |                                  |                                 |                                  |                                  |
|                                                                                      | Chromosome × Sex                | ns                                | ns                               | ns                               | ns                                 | ns                               | ns                              | ns                               | ns                               |
|                                                                                      | Chromosome × Family             | $F_{5,1132}=4.49$ ;<br>$p=0.0005$ | ns                               | ns                               | ns                                 | ns                               | $F_{4,1132}=2.77$ ;<br>$p=0.03$ | $F_{4,1132}=2.62$ ;<br>$p=0.03$  | $F_{4,1132}=2.22$ ;<br>$p=0.02$  |
|                                                                                      | Chromosome × Sex × Family       | ns                                | ns                               | ns                               | ns                                 | ns                               | ns                              | ns                               | ns                               |
|                                                                                      | Sex                             |                                   |                                  |                                  |                                    |                                  |                                 |                                  |                                  |
|                                                                                      | ♂VS <sub>07</sub>               | $F_{1,1131}=3.15$ ;<br>$p=0.08$   | $F_{1,1131}=3.12$ ;<br>$p=0.08$  | $F_{1,1131}=7.36$ ;<br>$p=0.007$ | $F_{1,1131}=3.22$ ;<br>$p=0.07$    | $F_{1,1131}=8.84$ ;<br>$p=0.003$ | $F_{1,1131}=2.92$ ;<br>$p=0.09$ | ns                               | ns                               |
|                                                                                      | ♀VS <sub>07</sub>               | ns                                | ns                               | ns                               | $F_{1,1131}=9.58$ ;<br>$p=0.002$   | ns                               | ns                              | $F_{1,1131}=5.86$ ;<br>$p=0.02$  | $F_{1,1131}=5.52$ ;<br>$p=0.02$  |
| <b>3) Partitioned analysis of chromosome effects<sup>c</sup></b>                     |                                 |                                   |                                  |                                  |                                    |                                  |                                 |                                  |                                  |
|                                                                                      | VS <sub>07</sub> A              | ns                                | ns                               | ns                               | ns                                 | $F_{1,1131}=4.46$ ;<br>$p=0.04$  | ns                              | ns                               | $F_{1,1131}=4.51$ ;<br>$p=0.03$  |
|                                                                                      | VS <sub>07</sub> B              | ns                                | ns                               | $F_{1,1131}=3.7$ ;<br>$p=0.05$   | ns                                 | ns                               | $F_{1,1131}=9.2$ ;<br>$p=0.003$ | ns                               | ns                               |
|                                                                                      | Family                          |                                   |                                  |                                  |                                    |                                  |                                 |                                  |                                  |
|                                                                                      | VS <sub>07</sub> C <sub>1</sub> | $F_{1,1131}=10.28$ ;<br>$p=0.001$ | ns                               | ns                               | ns                                 | ns                               | $F_{1,1131}=3.38$ ;<br>$p=0.07$ | $F_{1,1131}=9.72$ ;<br>$p=0.002$ | $F_{1,1131}=7.2$ ;<br>$p=0.007$  |
|                                                                                      | VS <sub>07</sub> C <sub>2</sub> | $F_{1,1131}=2.93$ ;<br>$p=0.09$   | $F_{1,1131}=7.44$ ;<br>$p=0.007$ | ns                               | $F_{1,1131}=11.06$ ;<br>$p=0.0009$ | ns                               | ns                              | ns                               | $F_{1,1131}=4.22$ ;<br>$p=0.04$  |
|                                                                                      | VS <sub>07</sub> C <sub>3</sub> | $F_{1,1131}=8.47$ ;<br>$p=0.004$  | ns                               | ns                               | ns                                 | ns                               | ns                              | $F_{1,1131}=6.62$ ;<br>$p=0.01$  | ns                               |

<sup>a</sup>Empirical significance thresholds for chromosome-phenotype association were determined by 1,000 permutations of phenotypic values among chromosomal genotypes in a model that included all chromosomes as the independent variables and a given phenotypic trait as the dependent variable (Churchill and Doerge 1994). *F* thresholds for the trait "occurrence of larval feeding" in VS<sub>07</sub>:  $p < 0.05 = 9.708$ ;  $p < 0.1 = 8.546$ .

<sup>b</sup>Chromosome by environment interactions were evaluated by conducting a mixed-model analysis of variance for each chromosome and trait. We used Proc GlimMix (SAS 9.2) to examine the effect of chromosome, sex, family, and the interaction among these on the observed phenotypes. The SIMULATE option was used to obtain p-values corrected for the number of tests performed.

<sup>c</sup>Phenotypic differences associated with chromosome state within each level of sex and family were examined using the SLICE option in GLIMMIX to perform a partitioned analysis of the LS-means for each interaction. The SIMULATE option was used to obtain *p*-values corrected for the number of tests performed.

**Supplementary Table 6a.** Chromosomes affecting the percent change in larval weight after 48 hours of feeding on *Physoalis* by VS<sub>07</sub> backcross insects.

|                                                                          | Factor                    | H01                                                | H06                                                 | H08                                                   | H13                                                 | H15                                                   | H18                                                   | H19                                                 | H28                                                | H29                                                |
|--------------------------------------------------------------------------|---------------------------|----------------------------------------------------|-----------------------------------------------------|-------------------------------------------------------|-----------------------------------------------------|-------------------------------------------------------|-------------------------------------------------------|-----------------------------------------------------|----------------------------------------------------|----------------------------------------------------|
| <b>1) Genome-wide significance<sup>a</sup></b>                           |                           | Observed <i>F</i>                                  | ns                                                  | ns                                                    | <i>F</i> =14.82                                     | ns                                                    | <i>F</i> =15.047                                      | ns                                                  | <i>F</i> =9.15                                     | ns                                                 |
|                                                                          | Chromosome                | <i>F</i> <sub>1,789</sub> =6.43;<br><i>p</i> =0.01 | <i>F</i> <sub>1,793</sub> =4.32;<br><i>p</i> =0.04  | <i>F</i> <sub>1,793</sub> =12.29;<br><i>p</i> =0.0005 | <i>F</i> <sub>1,789</sub> =4.86;<br><i>p</i> =0.03  | <i>F</i> <sub>1,789</sub> =13.50;<br><i>p</i> =0.0003 | <i>F</i> <sub>1,793</sub> =3.30;<br><i>p</i> =0.07    | <i>F</i> <sub>1,789</sub> =7.05;<br><i>p</i> =0.008 | <i>F</i> <sub>1,789</sub> =2.95;<br><i>p</i> =0.09 | <i>F</i> <sub>1,793</sub> =5.37;<br><i>p</i> =0.02 |
|                                                                          | Sex                       | ns                                                 | ns                                                  | ns                                                    | ns                                                  | ns                                                    | ns                                                    | ns                                                  | ns                                                 | ns                                                 |
|                                                                          | Family                    | <i>F</i> <sub>4,789</sub> =2.02;<br><i>p</i> =0.09 | ns                                                  | ns                                                    | <i>F</i> <sub>4,789</sub> =2.07;<br><i>p</i> =0.08  | <i>F</i> <sub>4,789</sub> =2.00;<br><i>p</i> =0.09    | ns                                                    | <i>F</i> <sub>4,789</sub> =2.00;<br><i>p</i> =0.09  | <i>F</i> <sub>4,789</sub> =2.01;<br><i>p</i> =0.09 | ns                                                 |
| <b>2) Mixed model analysis of chromosome by environment interactions</b> |                           | Chromosome × Sex                                   | ns                                                  | ns                                                    | ns                                                  | ns                                                    | ns                                                    | ns                                                  | ns                                                 | ns                                                 |
|                                                                          | Chromosome × Family       | ns                                                 | ns                                                  | ns                                                    | ns                                                  | ns                                                    | ns                                                    | ns                                                  | ns                                                 | ns                                                 |
|                                                                          | Chromosome × Sex × Family | ns                                                 | ns                                                  | ns                                                    | ns                                                  | ns                                                    | ns                                                    | ns                                                  | ns                                                 | ns                                                 |
|                                                                          | Sex                       | ♂VS <sub>07</sub>                                  | ns                                                  | ns                                                    | <i>F</i> <sub>1,783</sub> =8.51;<br><i>p</i> =0.004 | <i>F</i> <sub>1,783</sub> =3.93;<br><i>p</i> =0.05    | ns                                                    | <i>F</i> <sub>1,783</sub> =3.74;<br><i>p</i> =0.05  | ns                                                 | <i>F</i> <sub>1,783</sub> =4.11;<br><i>p</i> =0.04 |
|                                                                          |                           | ♀VS <sub>07</sub>                                  | <i>F</i> <sub>1,783</sub> =7.17;<br><i>p</i> =0.008 | ns                                                    | <i>F</i> <sub>1,783</sub> =3.53;<br><i>p</i> =0.06  | ns                                                    | <i>F</i> <sub>1,783</sub> =12.91;<br><i>p</i> =0.0003 | ns                                                  | <i>F</i> <sub>1,783</sub> =5.77;<br><i>p</i> =0.02 | ns                                                 |
| <b>3) Partitioned analysis of chromosome effects</b>                     |                           | VS <sub>07</sub> A                                 | <i>F</i> <sub>1,783</sub> =4.36;<br><i>p</i> =0.04  | ns                                                    | ns                                                  | ns                                                    | ns                                                    | ns                                                  | ns                                                 | ns                                                 |
|                                                                          | VS <sub>07</sub> B        | <i>F</i> <sub>1,783</sub> =2.67;<br><i>p</i> =0.10 | <i>F</i> <sub>1,783</sub> =4.21;<br><i>p</i> =0.04  | ns                                                    | ns                                                  | ns                                                    | ns                                                    | ns                                                  | ns                                                 | ns                                                 |
|                                                                          | Family                    | VS <sub>07</sub> C <sub>1</sub>                    | ns                                                  | ns                                                    | ns                                                  | ns                                                    | ns                                                    | <i>F</i> <sub>1,783</sub> =3.42;<br><i>p</i> =0.07  | ns                                                 | ns                                                 |
|                                                                          |                           | VS <sub>07</sub> C <sub>2</sub>                    | ns                                                  | ns                                                    | <i>F</i> <sub>1,783</sub> =4.67;<br><i>p</i> =0.03  | ns                                                    | <i>F</i> <sub>1,783</sub> =6.66;<br><i>p</i> =0.01    | <i>F</i> <sub>1,783</sub> =4.02;<br><i>p</i> =0.05  | ns                                                 | <i>F</i> <sub>1,783</sub> =4.98;<br><i>p</i> =0.03 |
|                                                                          |                           | VS <sub>07</sub> C <sub>3</sub>                    | ns                                                  | ns                                                    | <i>F</i> <sub>1,783</sub> =5.70;<br><i>p</i> =0.02  | ns                                                    | <i>F</i> <sub>1,783</sub> =3.09;<br><i>p</i> =0.08    | ns                                                  | ns                                                 | <i>F</i> <sub>1,783</sub> =3.73;<br><i>p</i> =0.05 |

<sup>a</sup>*F* thresholds for the trait "percent change in larval weight" in VS<sub>07</sub>: *p* < 0.05 = 10.174; *p* < 0.1 = 8.633.

**Supplementary Table 6b.** Chromosomes affecting the percent change in larval weight after 48 hours of feeding on *Physalis* by VS<sub>01</sub> backcross insects.

| Factor                                                                   |                           | H05                               | H19                               | H29                               |
|--------------------------------------------------------------------------|---------------------------|-----------------------------------|-----------------------------------|-----------------------------------|
| <b>1) Genome-wide significance<sup>a</sup></b>                           |                           |                                   |                                   |                                   |
|                                                                          | Observed <i>F</i>         | ns                                | 11.2                              | ns                                |
|                                                                          | Chromosome                | $F_{1,213}=5.03$ ;<br>$p=0.03$    | $F_{1,213}=22.02$ ;<br>$p<0.0001$ | ns                                |
|                                                                          | Sex                       | $F_{1,213}=17.11$ ;<br>$p<0.0001$ | $F_{1,213}=16.79$ ;<br>$p<0.0001$ | $F_{1,213}=10.03$ ;<br>$p=0.002$  |
|                                                                          | Family                    | $F_{1,213}=52.42$ ;<br>$p<0.0001$ | $F_{1,213}=42.41$ ;<br>$p<0.0001$ | $F_{1,213}=40.99$ ;<br>$p<0.0001$ |
| <b>2) Mixed model analysis of chromosome by environment interactions</b> |                           |                                   |                                   |                                   |
|                                                                          | Chromosome × Sex          | $F_{1,213}=4.84$ ;<br>$p=0.03$    | ns                                | ns                                |
|                                                                          | Chromosome × Family       | $F_{1,213}=9.16$ ;<br>$p=0.003$   | ns                                | $F_{1,213}=4.79$ ;<br>$p=0.009$   |
|                                                                          | Chromosome × Sex × Family | $F_{4,213}=5.72$ ;<br>$p=0.004$   | $F_{4,213}=2.29$ ;<br>$p=0.07$    | $F_{4,213}=2.35$ ;<br>$p=0.07$    |
|                                                                          | Sex                       |                                   |                                   |                                   |
|                                                                          | ♂VS <sub>01</sub>         | ns                                | $F_{1,215}=7.08$ ;<br>$p=0.008$   | ns                                |
|                                                                          | ♀VS <sub>01</sub>         | $F_{1,215}=6.83$ ;<br>$p=0.01$    | $F_{1,215}=12.30$ ;<br>$p=0.0006$ | ns                                |
| <b>3) Partitioned analysis of chromosome effects</b>                     |                           |                                   |                                   |                                   |
|                                                                          | Family                    |                                   |                                   |                                   |
|                                                                          | VS <sub>01</sub> A        | ns                                | $F_{1,215}=12.33$ ;<br>$p=0.0005$ | ns                                |
|                                                                          | VS <sub>01</sub> B        | $F_{1,215}=8.48$ ;<br>$p=0.004$   | $F_{1,215}=7.33$ ;<br>$p=0.007$   | $F_{1,215}=8.32$ ;<br>$p=0.004$   |

<sup>a</sup>*F* thresholds for the trait "percent change in larval weight" in VS<sub>01</sub>:  $p < 0.05 = 9.463$ ;  $p < 0.1 = 8.362$ .

**Supplementary Table 7a.** Chromosomes affecting the number of holes bored in the calyx of *Physalis* by VS<sub>07</sub> backcross insects.

| Factor                                                                   |                                 | H05                                | H06                                | H11                                | H17                               | H19                                | H22                                | H26                                | H28                                | H29                                |
|--------------------------------------------------------------------------|---------------------------------|------------------------------------|------------------------------------|------------------------------------|-----------------------------------|------------------------------------|------------------------------------|------------------------------------|------------------------------------|------------------------------------|
| <b>1) Genome-wide significance<sup>a</sup></b>                           |                                 | ns                                 | ns                                 | ns                                 | ns                                | ns                                 | ns                                 | ns                                 | ns                                 | ns                                 |
| Observed <i>F</i>                                                        |                                 | ns                                 | ns                                 | ns                                 | ns                                | ns                                 | ns                                 | ns                                 | ns                                 | ns                                 |
| Chromosome                                                               |                                 | $F_{1,1137}=18.38$ ;<br>$p<0.0001$ | $F_{1,1137}=11.33$ ;<br>$p=0.0008$ | ns                                 | ns                                | $F_{1,1137}=13.21$ ;<br>$p=0.0003$ | ns                                 | $F_{1,1137}=17.23$ ;<br>$p<0.0001$ | $F_{1,1137}=12.49$ ;<br>$p=0.0004$ | $F_{1,1137}=19.23$ ;<br>$p<0.0001$ |
| Sex                                                                      |                                 | ns                                 | ns                                 | ns                                 | ns                                | ns                                 | ns                                 | ns                                 | ns                                 | ns                                 |
| Family                                                                   |                                 | $F_{4,1137}=17.04$ ;<br>$p<0.0001$ | $F_{4,1137}=18.28$ ;<br>$p<0.0001$ | $F_{4,1137}=18.5$ ;<br>$p<0.0001$  | $F_{4,1137}=16.3$ ;<br>$p<0.0001$ | $F_{4,1137}=18.29$ ;<br>$p<0.0001$ | $F_{4,1137}=18.16$ ;<br>$p<0.0001$ | $F_{4,1137}=18.98$ ;<br>$p<0.0001$ | $F_{4,1137}=17.4$ ;<br>$p<0.0001$  | $F_{4,1137}=17.83$ ;<br>$p<0.0001$ |
| <b>2) Mixed model analysis of chromosome by environment interactions</b> |                                 |                                    |                                    |                                    |                                   |                                    |                                    |                                    |                                    |                                    |
| Chromosome × Sex                                                         |                                 | ns                                 | ns                                 | ns                                 | ns                                | ns                                 | $F_{2,1131}=4.9$ ;<br>$p=0.008$    | ns                                 | ns                                 | $F_{2,1135}=5.58$ ;<br>$p=0.004$   |
| Chromosome × Family                                                      |                                 | ns                                 | $F_{4,1133}=6.3$ ;<br>$p<0.0001$   | $F_{5,1133}=4.23$ ;<br>$p=0.0008$  | $F_{5,1133}=4.5$ ;<br>$p=0.0005$  | ns                                 | ns                                 | ns                                 | ns                                 | ns                                 |
| Chromosome × Sex × Family                                                |                                 | ns                                 | ns                                 | ns                                 | ns                                | ns                                 | ns                                 | ns                                 | ns                                 | ns                                 |
| Sex                                                                      | ♂VS <sub>07</sub>               | ns                                 | $F_{1,1131}=7.09$ ;<br>$p=0.008$   | ns                                 | ns                                | ns                                 | $F_{1,1131}=7.78$ ;<br>$p=0.005$   | $F_{1,1131}=10.46$ ;<br>$p=0.001$  | $F_{1,1131}=15.96$ ;<br>$p<0.0001$ | ns                                 |
|                                                                          | ♀VS <sub>07</sub>               | $F_{1,1131}=21.42$ ;<br>$p<0.0001$ | ns                                 | ns                                 | ns                                | $F_{1,1131}=9.3$ ;<br>$p=0.002$    | ns                                 | $F_{1,1131}=6.09$ ;<br>$p=0.01$    | ns                                 | $F_{1,1131}=30.7$ ;<br>$p<0.0001$  |
| <b>3) Partitioned analysis of chromosome effects</b>                     |                                 |                                    |                                    |                                    |                                   |                                    |                                    |                                    |                                    |                                    |
| VS <sub>07</sub>                                                         | A                               | ns                                 | $F_{1,1131}=13.03$ ;<br>$p=0.0003$ | ns                                 | $F_{1,1131}=4.12$ ;<br>$p=0.04$   | $F_{1,1131}=8.4$ ;<br>$p=0.004$    | ns                                 | ns                                 | ns                                 | ns                                 |
|                                                                          | B                               | ns                                 | ns                                 | $F_{1,1131}=2.98$ ;<br>$p=0.08$    | ns                                | $F_{1,1131}=3.14$ ;<br>$p=0.08$    | ns                                 | ns                                 | $F_{1,1131}=6.92$ ;<br>$p=0.009$   | ns                                 |
| Family                                                                   | VS <sub>07</sub> C <sub>1</sub> | $F_{1,1131}=7.97$ ;<br>$p=0.005$   | $F_{1,1131}=7.88$ ;<br>$p=0.005$   | ns                                 | $F_{1,1131}=10.94$ ;<br>$p=0.001$ | ns                                 | ns                                 | $F_{1,1131}=12.18$ ;<br>$p=0.0005$ | $F_{1,1131}=8.67$ ;<br>$p=0.003$   | $F_{1,1131}=17.18$ ;<br>$p<0.0001$ |
|                                                                          | VS <sub>07</sub> C <sub>2</sub> | $F_{1,1131}=3.19$ ;<br>$p=0.07$    | $F_{1,1131}=12.27$ ;<br>$p=0.0005$ | ns                                 | $F_{1,1131}=2.89$ ;<br>$p=0.09$   | $F_{1,1131}=16.87$ ;<br>$p<0.0001$ | ns                                 | ns                                 | ns                                 | $F_{1,1131}=7.52$ ;<br>$p=0.006$   |
|                                                                          | VS <sub>07</sub> C <sub>3</sub> | $F_{1,1131}=4.89$ ;<br>$p=0.03$    | $F_{1,1131}=3.12$ ;<br>$p=0.08$    | $F_{1,1131}=13.88$ ;<br>$p=0.0002$ | $F_{1,1131}=3.52$ ;<br>$p=0.06$   | ns                                 | ns                                 | $F_{1,1131}=3.38$ ;<br>$p=0.07$    | $F_{1,1131}=9.67$ ;<br>$p=0.002$   | $F_{1,1131}=3.17$ ;<br>$p=0.08$    |

<sup>a</sup>*F* thresholds for the trait "number of holes" in VS<sub>07</sub>:  $p < 0.05 = 10.222$ ;  $p < 0.1 = 8.697$ .



**Supplementary Table 7b.** Chromosomes affecting the number of holes bored in the calyx of *Physalis* by VS<sub>01</sub> backcross insects.

|                                                                          | Factor                    | H01                               | H05                               | H17                             | H18                               | H19                               |
|--------------------------------------------------------------------------|---------------------------|-----------------------------------|-----------------------------------|---------------------------------|-----------------------------------|-----------------------------------|
| <b>1) Genome-wide significance<sup>a</sup></b>                           |                           |                                   |                                   |                                 |                                   |                                   |
|                                                                          | Observed <i>F</i>         | ns                                | ns                                | ns                              | ns                                | ns                                |
|                                                                          | Chromosome                | $F_{1,286}=7.64$ ;<br>$p=0.006$   | ns                                | ns                              | $F_{1,286}=4.43$ ;<br>$p=0.04$    | $F_{1,286}=7.7$ ;<br>$p=0.006$    |
|                                                                          | Sex                       | ns                                | ns                                | ns                              | ns                                | ns                                |
|                                                                          | Family                    | $F_{1,286}=12.04$ ;<br>$p=0.0006$ | $F_{1,284}=12.17$ ;<br>$p=0.0006$ | $F_{1,285}=9.12$ ;<br>$p=0.003$ | $F_{1,286}=11.56$ ;<br>$p=0.0008$ | $F_{1,286}=12.07$ ;<br>$p=0.0006$ |
| <b>2) Mixed model analysis of chromosome by environment interactions</b> |                           |                                   |                                   |                                 |                                   |                                   |
|                                                                          | Chromosome × Sex          | ns                                | $F_{3,284}=3.45$ ;<br>$p=0.02$    | ns                              | ns                                | ns                                |
|                                                                          | Chromosome × Family       | ns                                | ns                                | $F_{2,285}=6.24$ ;<br>$p=0.02$  | ns                                | ns                                |
|                                                                          | Chromosome × Sex × Family | ns                                | ns                                | ns                              | ns                                | ns                                |
|                                                                          | Sex                       |                                   |                                   |                                 |                                   |                                   |
|                                                                          | ♂VS <sub>01</sub>         | ns                                | $F_{1,283}=6.17$ ;<br>$p=0.01$    | ns                              | $F_{1,283}=3.29$ ;<br>$p=0.07$    | ns                                |
|                                                                          | ♀VS <sub>01</sub>         | $F_{1,283}=5.35$ ;<br>$p=0.02$    | $F_{1,283}=4.45$ ;<br>$p=0.04$    | ns                              | ns                                | $F_{1,283}=5.46$ ;<br>$p=0.02$    |
| <b>3) Partitioned analysis of chromosome effects</b>                     |                           |                                   |                                   |                                 |                                   |                                   |
|                                                                          | Family                    |                                   |                                   |                                 |                                   |                                   |
|                                                                          | VS <sub>01</sub> A        | $F_{1,283}=6.56$ ;<br>$p=0.01$    | ns                                | $F_{1,283}=4.32$ ;<br>$p=0.04$  | ns                                | $F_{1,283}=5.33$ ;<br>$p=0.02$    |
|                                                                          | VS <sub>01</sub> B        | ns                                | ns                                | $F_{1,283}=7.79$ ;<br>$p=0.006$ | $F_{1,283}=4.35$ ;<br>$p=0.04$    | ns                                |

<sup>a</sup>*F* thresholds for the trait "number of holes" in VS<sub>01</sub>:  $p < 0.05 = 9.895$ ;  $p < 0.1 = 8.291$ .

**Supplementary Table 8a.** Chromosomes affecting assimilation efficiency of VS<sub>07</sub> backcross insects on *Physalis*.

|                                                                          | Factor                          | H01                             | H03                            | H08                            | H10                               | H13                             | H14                            | H15                               | H16                            | H18                            |                            |
|--------------------------------------------------------------------------|---------------------------------|---------------------------------|--------------------------------|--------------------------------|-----------------------------------|---------------------------------|--------------------------------|-----------------------------------|--------------------------------|--------------------------------|----------------------------|
| <b>1) Genome-wide significance<sup>a</sup></b>                           |                                 | Observed <i>F</i>               | ns                             | ns                             | ns                                | F=8.62                          | ns                             | ns                                | F=14.76                        | ns                             | ns                         |
|                                                                          | Chromosome                      | $F_{1,785}=6.86$ ;<br>$p=0.01$  | $F_{1,785}=5.75$ ;<br>$p=0.02$ | $F_{1,785}=5.08$ ;<br>$p=0.02$ | $F_{1,785}=6.16$ ;<br>$p=0.01$    | $F_{1,785}=4.06$ ;<br>$p=0.01$  | $F_{4,785}=4.07$ ;<br>$p=0.04$ | $F_{4,785}=11.76$ ;<br>$p=0.0006$ | ns                             | $F_{1,785}=5.26$ ;<br>$p=0.02$ |                            |
|                                                                          | Sex                             | ns                              | ns                             | ns                             | ns                                | ns                              | ns                             | ns                                | ns                             | ns                             |                            |
| <b>2) Mixed model analysis of chromosome by environment interactions</b> |                                 | Family                          | $F_{4,785}=3.24$ ;<br>$p=0.01$ | $F_{4,785}=3.24$ ;<br>$p=0.01$ | $F_{4,785}=2.79$ ;<br>$p=0.03$    | $F_{4,783}=2.89$ ;<br>$p=0.02$  | $F_{4,785}=3.28$ ;<br>$p=0.01$ | $F_{4,785}=2.97$ ;<br>$p=0.02$    | $F_{4,785}=3.05$ ;<br>$p=0.02$ | $F_{4,783}=2.88$ ;<br>$p=0.02$ | $F_{4,785}=3.1$ ; $p=0.02$ |
|                                                                          | Chromosome × Sex                | ns                              | ns                             | ns                             | $F_{2,783}=2.92$ ;<br>$p=0.05$    | ns                              | ns                             | ns                                | $F_{3,783}=3.11$ ;<br>$p=0.03$ | ns                             |                            |
|                                                                          | Chromosome × Family             | ns                              | ns                             | ns                             | ns                                | ns                              | ns                             | ns                                | ns                             | ns                             |                            |
|                                                                          | Chromosome × Sex × Family       | ns                              | ns                             | ns                             | ns                                | ns                              | ns                             | ns                                | ns                             | ns                             |                            |
| <b>3) Partitioned analysis of chromosome effects</b>                     |                                 | Sex                             | ♂VS <sub>07</sub>              | ns                             | ns                                | $F_{1,779}=7.10$ ;<br>$p=0.008$ | ns                             | ns                                | ns                             | $F_{1,779}=6.18$ ;<br>$p=0.01$ | ns                         |
|                                                                          | ♀VS <sub>07</sub>               | $F_{1,779}=5.20$ ;<br>$p=0.02$  | $F_{1,779}=3.16$ ;<br>$p=0.08$ | ns                             | $F_{1,779}=12.90$ ;<br>$p=0.0003$ | $F_{1,779}=2.85$ ;<br>$p=0.09$  | $F_{1,779}=5.07$ ;<br>$p=0.02$ | $F_{1,779}=10.34$ ;<br>$p=0.001$  | ns                             | $F_{1,779}=3.40$ ;<br>$p=0.07$ |                            |
|                                                                          | VS <sub>07</sub> A              | $F_{1,779}=6.91$ ;<br>$p=0.009$ | ns                             | ns                             | ns                                | $F_{1,779}=3.62$ ;<br>$p=0.06$  | ns                             | ns                                | ns                             | ns                             |                            |
|                                                                          | VS <sub>07</sub> B              | ns                              | ns                             | ns                             | $F_{1,779}=4.31$ ;<br>$p=0.04$    | ns                              | ns                             | ns                                | ns                             | ns                             |                            |
|                                                                          | Family                          | VS <sub>07</sub> C <sub>1</sub> | ns                             | $F_{1,779}=3.19$ ;<br>$p=0.07$ | ns                                | ns                              | ns                             | ns                                | ns                             | ns                             |                            |
|                                                                          | VS <sub>07</sub> C <sub>2</sub> | ns                              | $F_{1,779}=4.20$ ;<br>$p=0.04$ | ns                             | ns                                | ns                              | ns                             | ns                                | ns                             | $F_{1,779}=3.92$ ;<br>$p=0.05$ |                            |
|                                                                          | VS <sub>07</sub> C <sub>3</sub> | ns                              | ns                             | ns                             | ns                                | ns                              | ns                             | $F_{1,779}=4.48$ ;<br>$p=0.03$    | ns                             | ns                             |                            |

<sup>a</sup>*F* thresholds for the trait "assimilation efficiency" in VS<sub>07</sub>:  $p < 0.05 = 9.832$ ;  $p < 0.1 = 8.348$ .

**Supplementary Table 8b.** Chromosomes affecting assimilation efficiency of VS<sub>01</sub> backcross insects on *Physalis*.

|                                                                          | <b>Factor</b>             | <b>H03</b>                     | <b>H19</b>                        | <b>H20</b>                        |
|--------------------------------------------------------------------------|---------------------------|--------------------------------|-----------------------------------|-----------------------------------|
| <b>1) Genome-wide significance<sup>a</sup></b>                           | Observed <i>F</i>         | ns                             | 14.55                             | ns                                |
|                                                                          | Chromosome                | $F_{1,216}=4.79$ ;<br>$p=0.03$ | $F_{1,216}=18.86$ ;<br>$p<0.0001$ | $F_{1,216}=3.34$ ;<br>$p=0.07$    |
|                                                                          | Sex                       | $F_{1,216}=4.41$ ;<br>$p=0.04$ | $F_{1,216}=4.86$ ;<br>$p=0.03$    | ns                                |
|                                                                          | Family                    | $F_{1,216}=5.50$ ;<br>$p=0.02$ | $F_{1,216}=7.32$ ;<br>$p=0.007$   | $F_{1,216}=7.84$ ;<br>$p=0.006$   |
| <b>2) Mixed model analysis of chromosome by environment interactions</b> | Chromosome × Sex          | ns                             | $F_{1,216}=3.81$ ;<br>$p=0.05$    | ns                                |
|                                                                          | Chromosome × Family       | $F_{1,785}=2.88$ ;<br>$p=0.09$ | ns                                | ns                                |
|                                                                          | Chromosome × Sex × Family | ns                             | ns                                | ns                                |
|                                                                          | Sex                       | ♂ VS <sub>01</sub>             | ns                                | ns                                |
|                                                                          |                           | ♀ VS <sub>01</sub>             | $F_{1,215}=5.50$ ;<br>$p=0.02$    | $F_{1,215}=19.40$ ;<br>$p<0.0001$ |
| <b>3) Partitioned analysis of chromosome effects</b>                     | Family                    | VS <sub>01</sub> A             | $F_{1,215}=9.97$ ;<br>$p=0.002$   | $F_{1,215}=19.83$ ;<br>$p<0.0001$ |
|                                                                          |                           | VS <sub>01</sub> B             | ns                                | $F_{1,215}=3.17$ ;<br>$p=0.08$    |

<sup>a</sup>*F* thresholds for the trait "assimilation efficiency" in VS<sub>01</sub>:  $p < 0.05 = 9.655$ ;  $p < 0.1 = 8.429$ .

**Supplementary Table 9.** Kendall correlation coefficients between two measures of QTL effect size: 1) PVE = percent of variation explained in the backcross population; 2) Interspecific = percent of the phenotypic gap between *Hs* and *Hv* explained.

| QTL Category                                         | Correlation |
|------------------------------------------------------|-------------|
| All QTL                                              | 0.46***     |
| QTL affecting willingness to feed on <i>Physalis</i> | 0.94***     |
| QTL affecting percent change in larval weight        | 0.81***     |
| QTL affecting number of holes in calyx               | 0.61*       |
| QTL affecting assimilation efficiency                | 0.74***     |
| QTL with <i>Hs</i> -like effects                     | 0.47***     |
| QTL with <i>Hv</i> -like effects                     | 0.43†       |

\*\*\*  $p \leq 0.0001$ ; \*\*  $p \leq 0.001$ ; \*  $p \leq 0.05$

†Correlation not significant
